# Supplementary material for: Effect of Lipopolysaccharides (LPS) and Lipoteichoic Acid (LTA) on the Inflammatory Response in Rumen Epithelial Cells (REC) and the Impact of LPS on Claw Explants
Source: MDPI journal article supplement (doi:10.3390/ani11072058), 2021-07-09
Supplement: s1 [file s1]

# Supplementary: Effect of lipopolysaccharides (LPS) and lipoteichoic acid (LTA) on inflammatory response in rumen epithelial cells (REC) and the impact of LPS on claw explants

Nicole Reisinger, Dominik Wendner, Nora Schauerhuber, and Elisabeth Mayer

**Table S1:** Selected genes and references analysed in REC and claw explants.

| Selected genes (LPS pathway, Inflammation)       | Reference               |
|--------------------------------------------------|-------------------------|
| CD4 antigen (CD14)                               | NM_001103225            |
| Interleukin-1 beta (IL-1 beta)                   | NM_174093, XM_005212737 |
| Matrix metalloproteinase 2 (MMP2)                | NM_174745               |
| Matrix metalloproteinase 9 (MMP9)                | NM_174744               |
| Myeloid differentiation factor 88 (MyD88)        | NM_001014382            |
| Nuclear factor kappa-B (Nfkb)                    | NM_001076409            |
| Toll-like receptor 2 (TLR2)                      | NM_174197               |
| Toll-like receptor 4 (TLR4)                      | NM_174198               |
| Tumor necrosis factor (TNF)                      | NM_173966, XM_005223596 |
| TNF receptor associated factor (TRAF6)           | NM_001034661            |
| <b>Housekeeping genes</b>                        |                         |
| Beta actin (ACTB)                                | NM_173979               |
| Glyceraldehyde-3-phosphate dehydrogenase (GAPDH) | NM_001034034            |

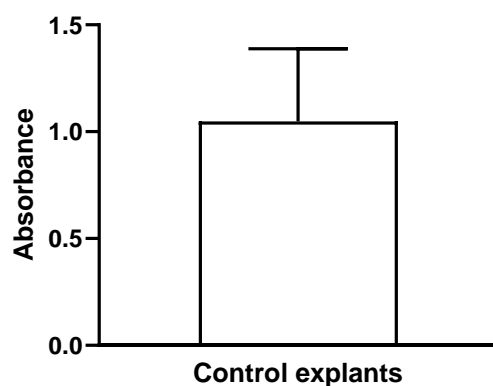

**Figure S1.** Absorbance values at 450 nm measured with the WST-1 assay of control explants after 24 h incubation with medium. Error bars display standard deviation.

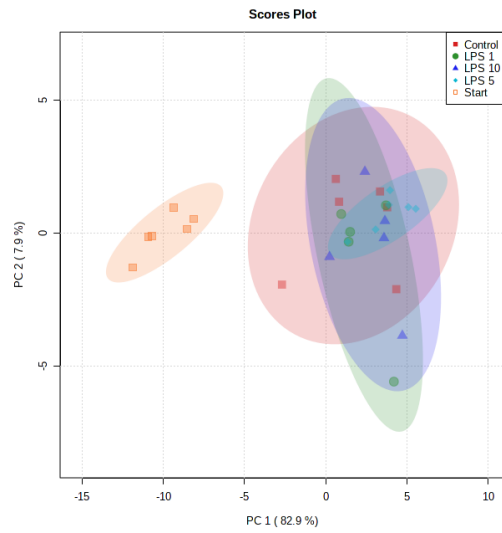

**Figure S2.** PCA plots of the expression of all measured genes of explants before incubation (Start), untreated explants (Control) after 4 hours incubation, and ex-plants incubated with 1, 5, and 10  $\mu\text{g/mL}$  LPS (LPS1, LPS5, LPS10) for 4 hours.  $n = 5$  animals.
